# Supplementary material for: Ca-ion modified vanadium oxide nanoribbons with enhanced Zn-ion storage capability
Source: Royal Society of Chemistry journal article supplement (doi:10.1039/d1ta10805k), 2022-01-01
Supplement: d1ta10805k1.pdf [file d1ta10805k1.pdf]

## Ca-ion Modified Vanadium Oxide Nanoribbons with Enhanced Zn-ion Storage Capability

Dezhou Zheng,<sup>a†</sup> Xiaokang Pei,<sup>a†</sup> Hai Lin,<sup>a</sup> Hongwei Tang,<sup>a</sup> Yin Song,<sup>a</sup> Qi Feng,<sup>a</sup>  
Guangxia Wang,<sup>a</sup> Wei Xu,<sup>a</sup> Fuxin Wang,<sup>\*a</sup> and Xihong Lu<sup>\*ab</sup>

<sup>a</sup>*School of Applied Physics and Materials, Wuyi University, Jiangmen 529020, PR China. E-mail: wangfux91@126.com; luxh6@mail.sysu.edu.cn*

<sup>b</sup>*The Key Lab of Low-carbon Chem & Energy Conservation of Guangdong Province, MOE of the Key Laboratory of Bioinorganic and Synthetic Chemistry, School of Chemistry, Sun Yat-Sen University, Guangzhou 510275, PR China*

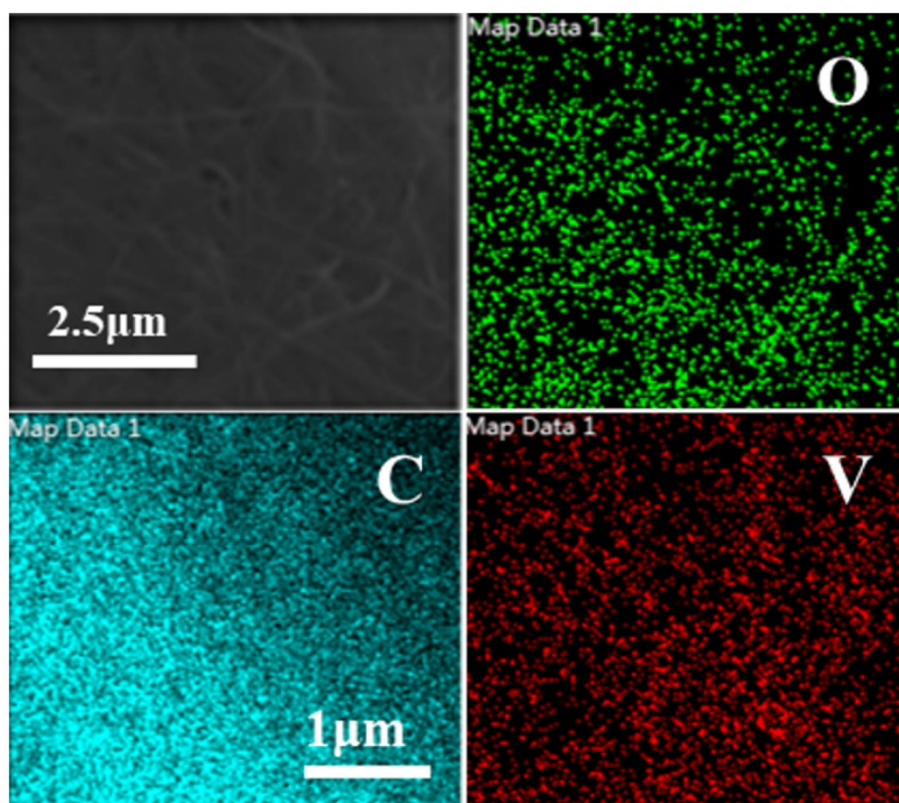

**Figure S1.** The EDS mapping of the VO sample.

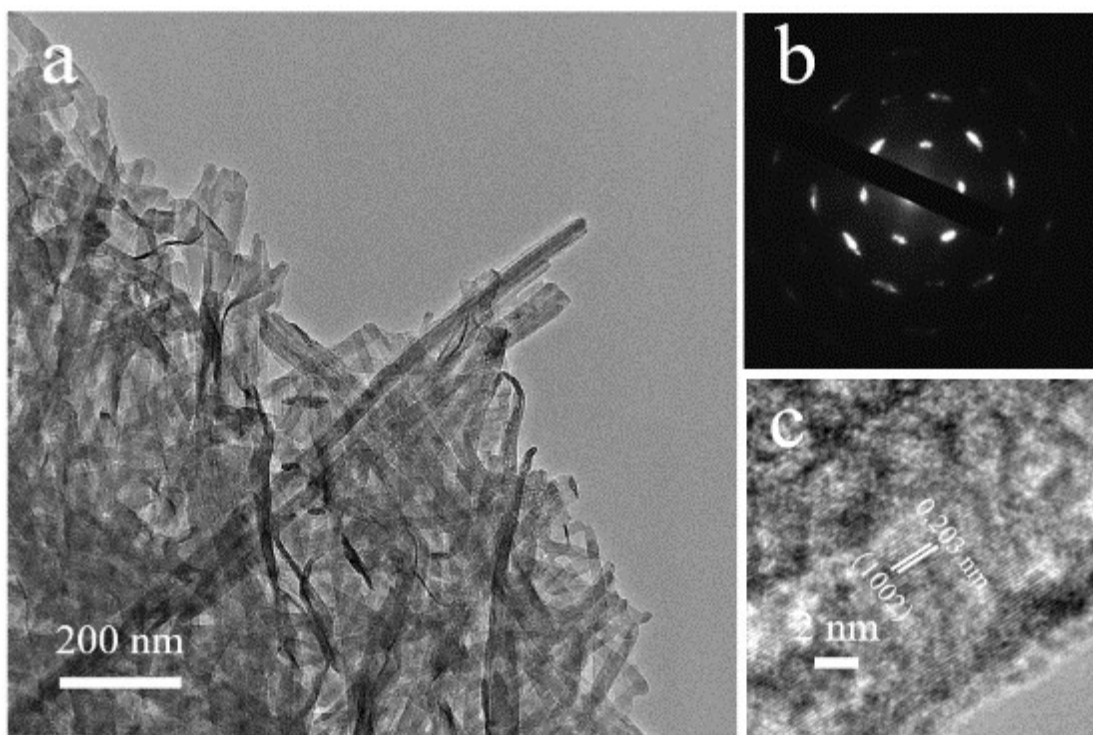

**Figure S2.** (a, c) TEM and HRTEM images of VO. (b) SAED image.

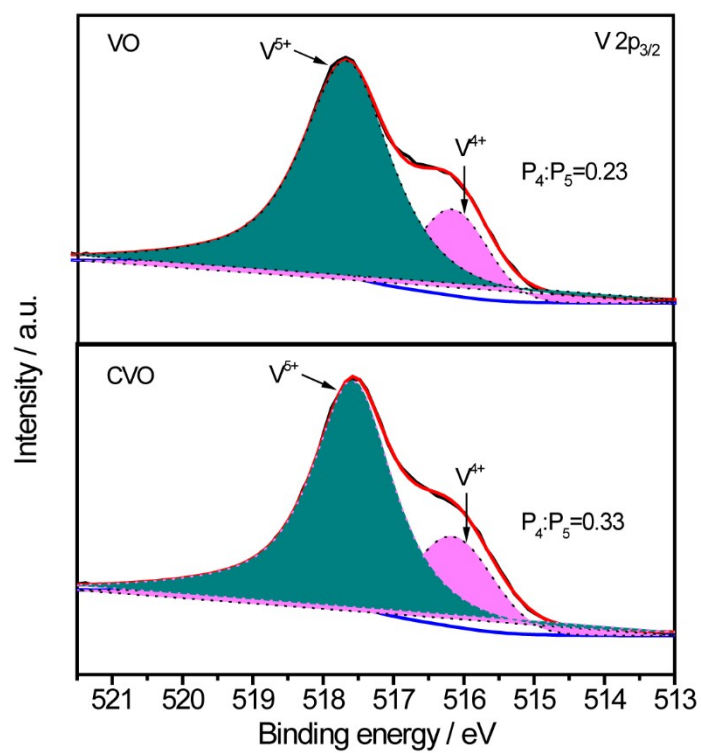

**Figure S3** V  $2p_{3/2}$  spectra of the synthesized VO and CVO samples.

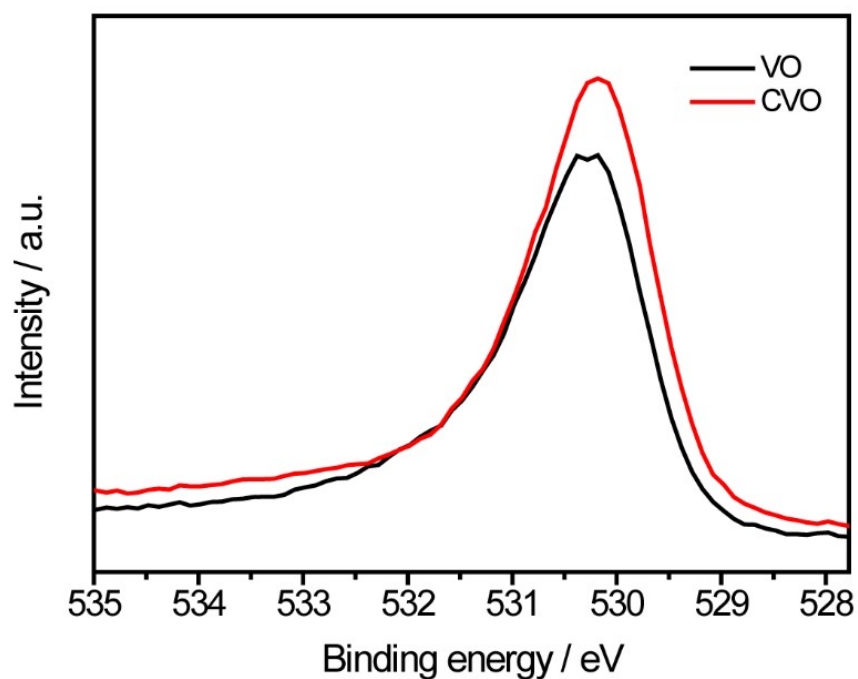

**Figure S4.** O 1s spectra of the VO and CVO sample.

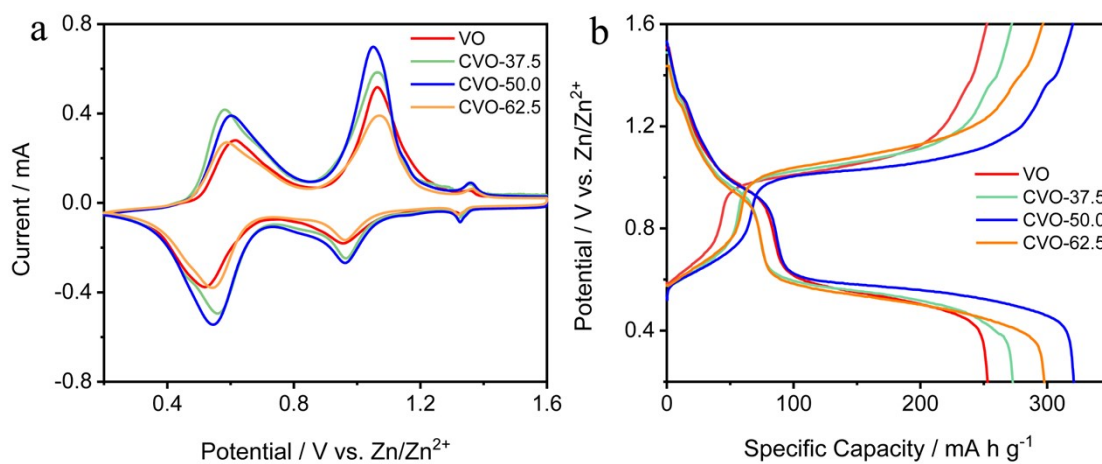

**Figure S5** CV and GCD curves of all batteries at a scan rate of  $0.1 \text{ mV s}^{-1}$  and current density of  $2 \text{ A g}^{-1}$ .

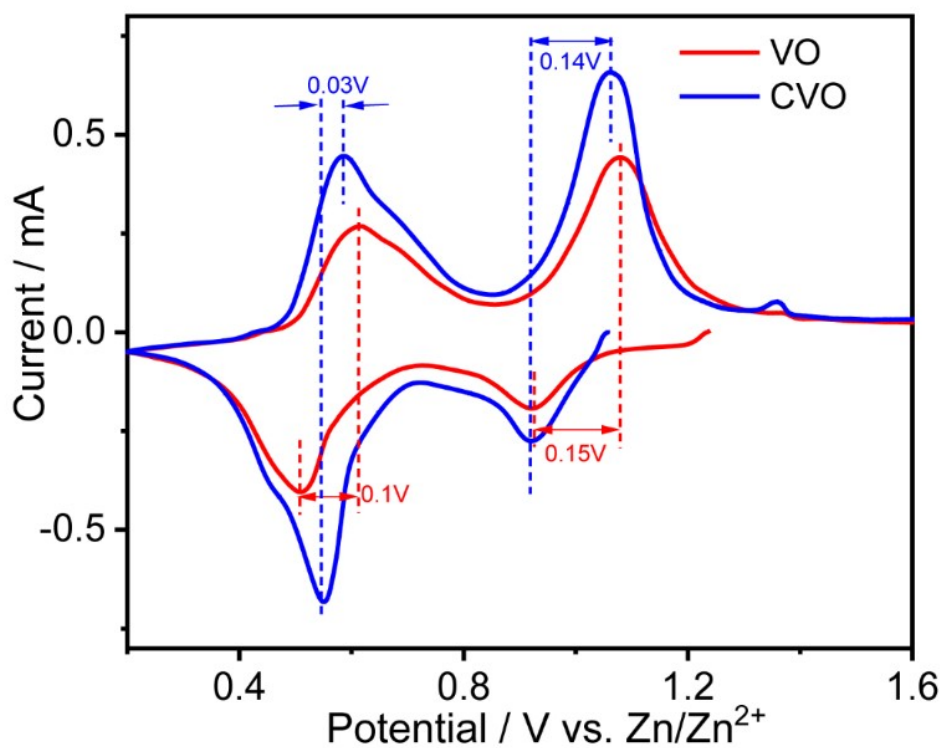

**Figure S6.** The first CV curve of VO and CVO samples at a scan rate of  $0.1 \text{ mV s}^{-1}$ .

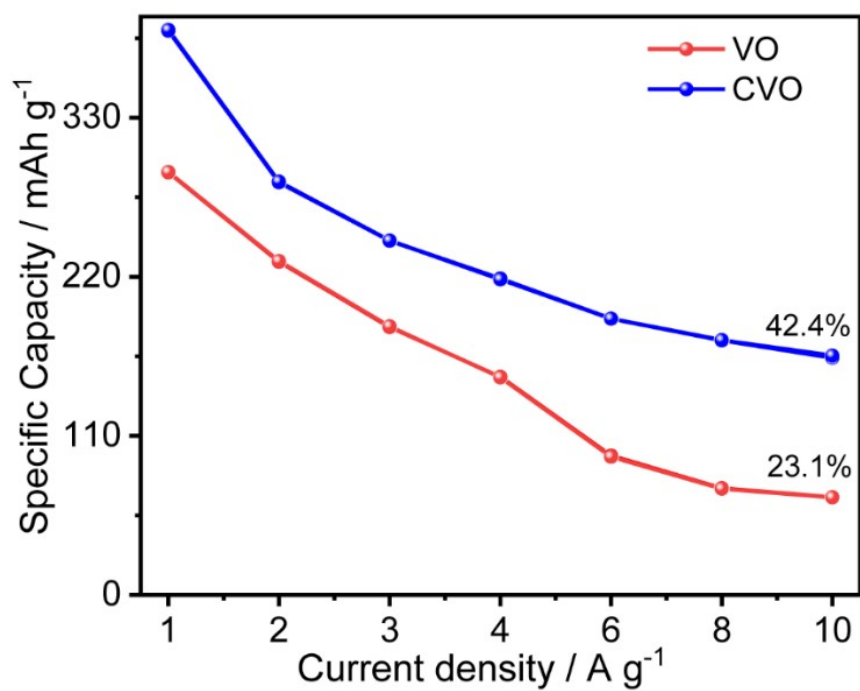

**Figure S7.** Capacity retention of VO and CVO.

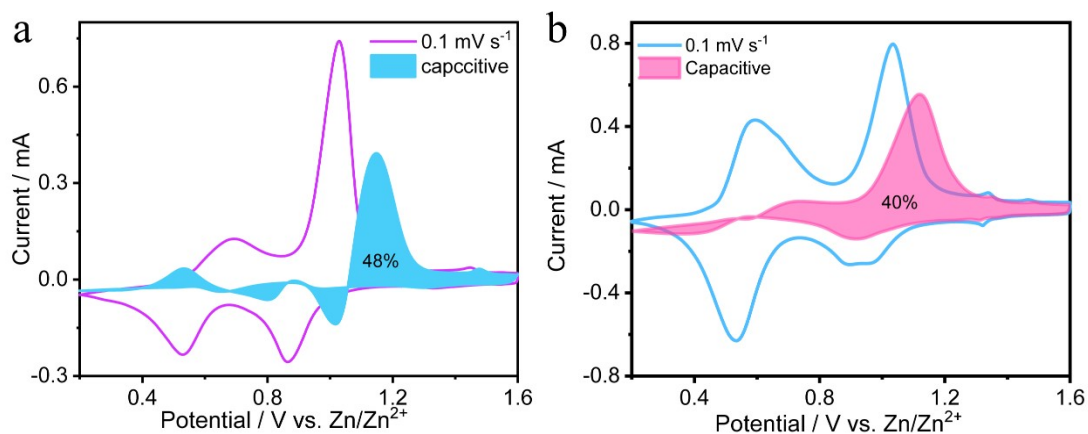

**Figure S8.** Capacitive contribution (inset) and diffusion contribution of CVO and VO electrode at 0.1 mV s<sup>-1</sup>.

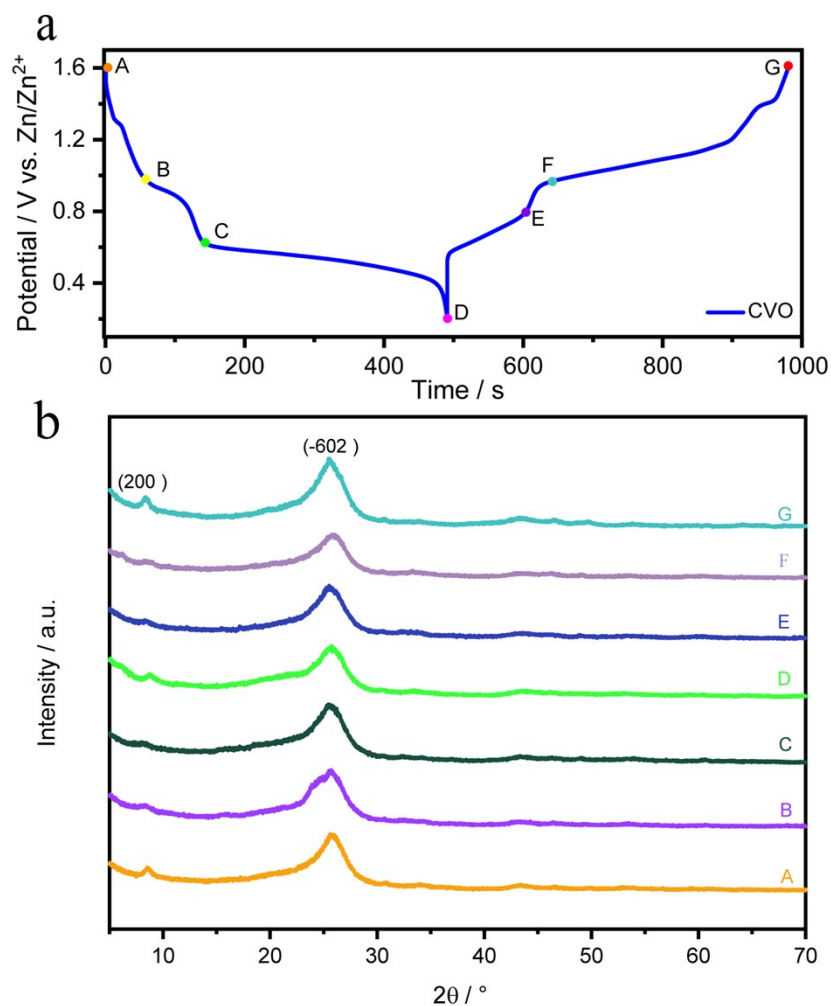

**Figure S9** (a) The GCD profile of CVO at 2 A g<sup>-1</sup>. (b) Ex-situ XRD patterns of CVO

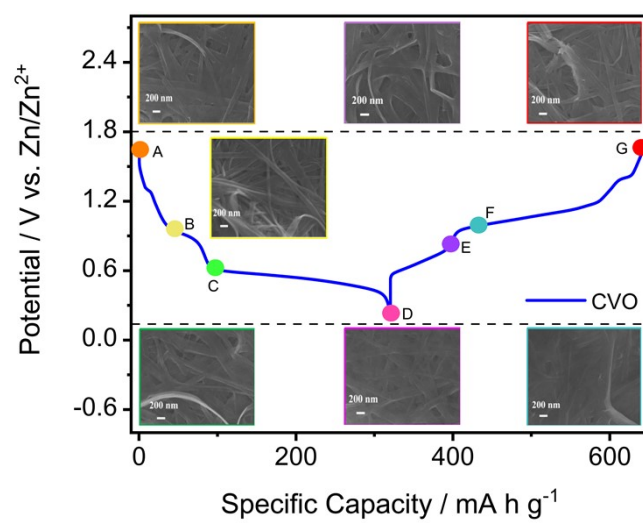

Figure S10 The GCD profile of CVO at 2 A g<sup>-1</sup>, the insets show the SEM for different state during the charging and discharging process.
